# Supplementary material for: Ethacrynic Acid Enhances the Antitumor Effects of Afatinib in EGFR/T790M-Mutated NSCLC by Inhibiting WNT/Beta-Catenin Pathway Activation
Source: Hindawi journal article supplement (doi:10.1155/2021/5530673), 2021-04-27

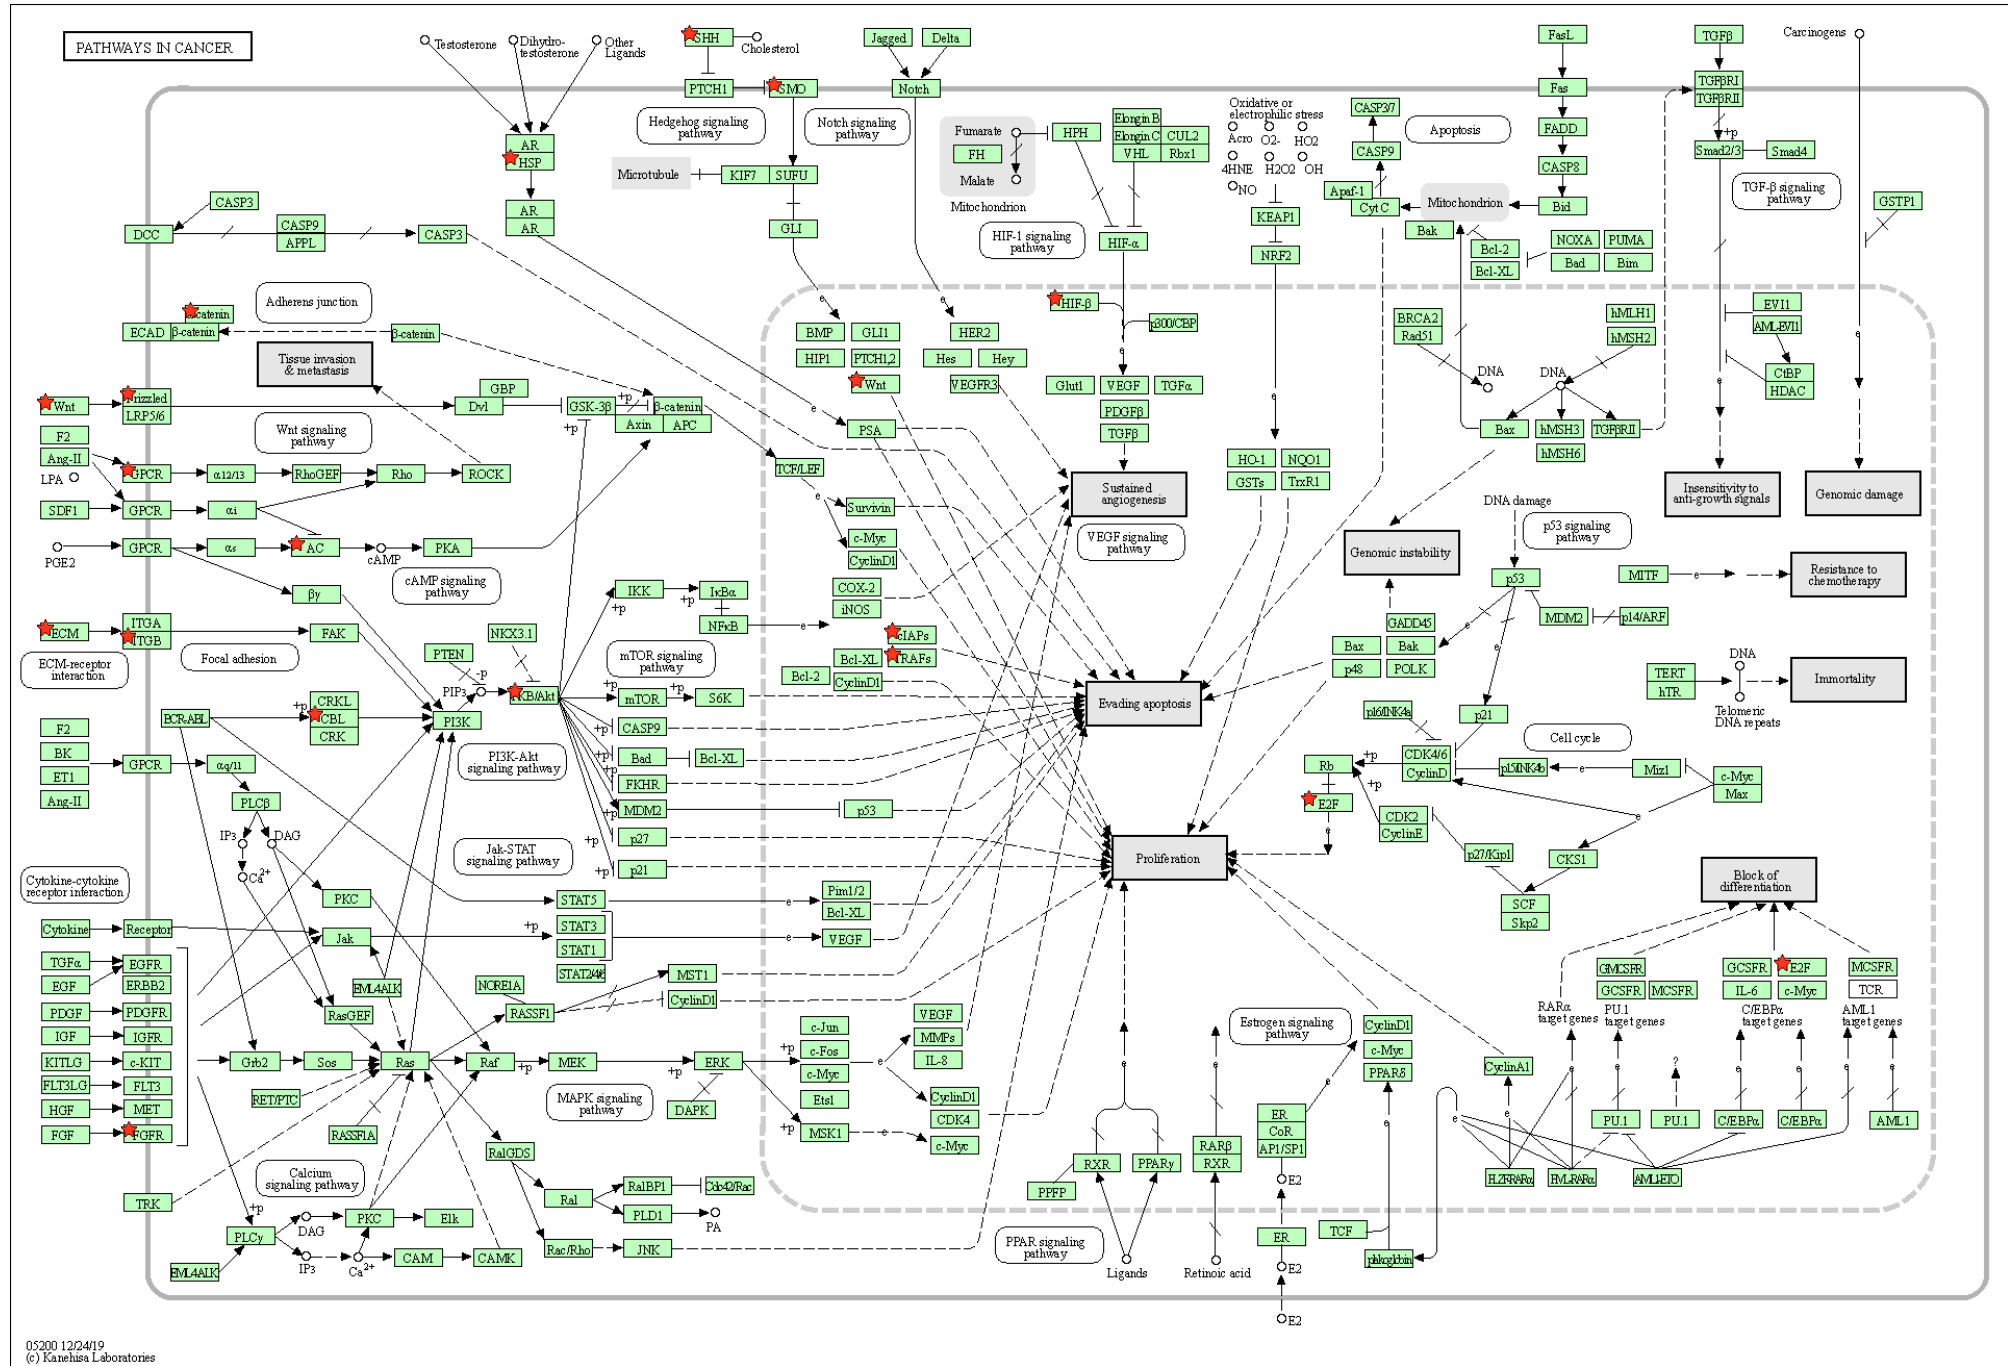

Supplement: f1 [file 5530673.f1.pdf]
